# Supplementary material for: Trends in Self-reported and Biochemically Verified Cocaine and Methamphetamine Use Among Pregnant Individuals in Northern California, 2011-2019
Source: PubMed Central journal article supplement (PMC9857285; doi:10.1001/jamanetworkopen.2022.48055), 2022-12-21
Supplement: jamanetwopen-e2248055-s001.pdf [file jamanetwopen-e2248055-s001.pdf]

## Data Sharing Statement

Young-Wolff. Trends in Self-reported and Biochemically Verified Cocaine and Methamphetamine Use Among Pregnant Individuals in Northern California, 2011-2019. *JAMA Netw Open*. Published December 21, 2022. doi:10.1001/jamanetworkopen.2022.48055

### Data

**Data available:** No
